# Supplementary material
Source: HighWire-hosted journal article supplement (https://erj.ersjournals.com/content/55/4/2000447)
Supplement: inline-supplementary-material-1 [file inline-supplementary-material-1.pdf]

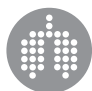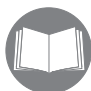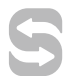

SHAREABLE PDF

# Altered metabolism in pulmonary hypertension: fuelling the fire or just smoke?

Daisy Duan<sup>1</sup>, Chenjuan Gu<sup>2</sup> and Jonathan C. Jun <sup>2</sup>

**Affiliations:** <sup>1</sup>Division of Endocrinology, Diabetes and Metabolism, Dept of Medicine, Johns Hopkins University School of Medicine, Baltimore, MD, USA. <sup>2</sup>Division of Pulmonary and Critical Care Medicine, Dept of Medicine, Johns Hopkins University School of Medicine, Baltimore, MD, USA.

**Correspondence:** Jonathan C. Jun, Pulmonary and Critical Care Medicine, Johns Hopkins University School of Medicine, 5501 Hopkins Bayview Circle, Rm 5A50.B, Baltimore, MD 21224, USA. E-mail: [jjun2@jhmi.edu](mailto:jjun2@jhmi.edu)

@ERSpublications

**Glucose and fat metabolism are altered in pulmonary arterial hypertension, but it is not yet clear if these changes are causes or effects of the disease** <http://bit.ly/3cWyf66>

**Cite this article as:** Duan D, Gu C, Jun JC. Altered metabolism in pulmonary hypertension: fuelling the fire or just smoke? *Eur Respir J* 2020; 55: 2000447 [<https://doi.org/10.1183/13993003.00447-2020>].

This single-page version can be shared freely online.

Pulmonary arterial hypertension (PAH) is characterised by progressive obliteration of the pulmonary vasculature, culminating in right-sided heart failure (HF). In recent years, studies have observed an association between systemic metabolic dysfunction, PAH and right ventricular failure [1]. Patients with PAH have an increased prevalence of obesity [2] and type 2 diabetes [3, 4]. Interestingly, abnormal glucose metabolism is evident even in non-diabetic individuals with PAH [5–7], and serves as an independent predictor of prognosis [8]. Right ventricular function is also associated with metabolic syndrome [9, 10], and myocardial tissue in mouse models of PAH exhibit defects in fatty acid oxidation associated with increased lipid deposition [11]. In addition, peroxisome proliferator-activated receptor- $\gamma$  (PPAR $\gamma$ ), a master regulator of adipogenesis and glucose homeostasis, has been implicated in the pathogenesis of vascular remodelling and subsequent development of PAH [12, 13]. PPAR $\gamma$  is also a downstream target of bone morphogenic protein receptor 2 (BMPR2) [14]. BMPR2 mutations are seen in up to 80% of hereditary PAH, and BMPR2 sporadic mutations occur in idiopathic PAH [15]. A rodent model of inducible BMPR2 overexpression develops insulin resistance preceding features of PAH [16]. Collectively, these observations suggest that impaired glucose metabolism may be a causative factor in PAH. However, most of the clinical data above is derived from cross-sectional studies with very limited metabolic outcomes.
